# Supplementary material
Source: PubMed Central journal article supplement (PMC1323458)

**Figure S1.** Distribution of conservation scores for the *D. melanogaster*/*D. pseudoobscura* analysis, on actual (red) and randomized (black) 3' UTR sequences. Scores corresponding to some of the known miRNA target sites and RNA-binding protein sites are indicated by arrows. The top portions of both distributions are not shown, for the purpose of presentation.

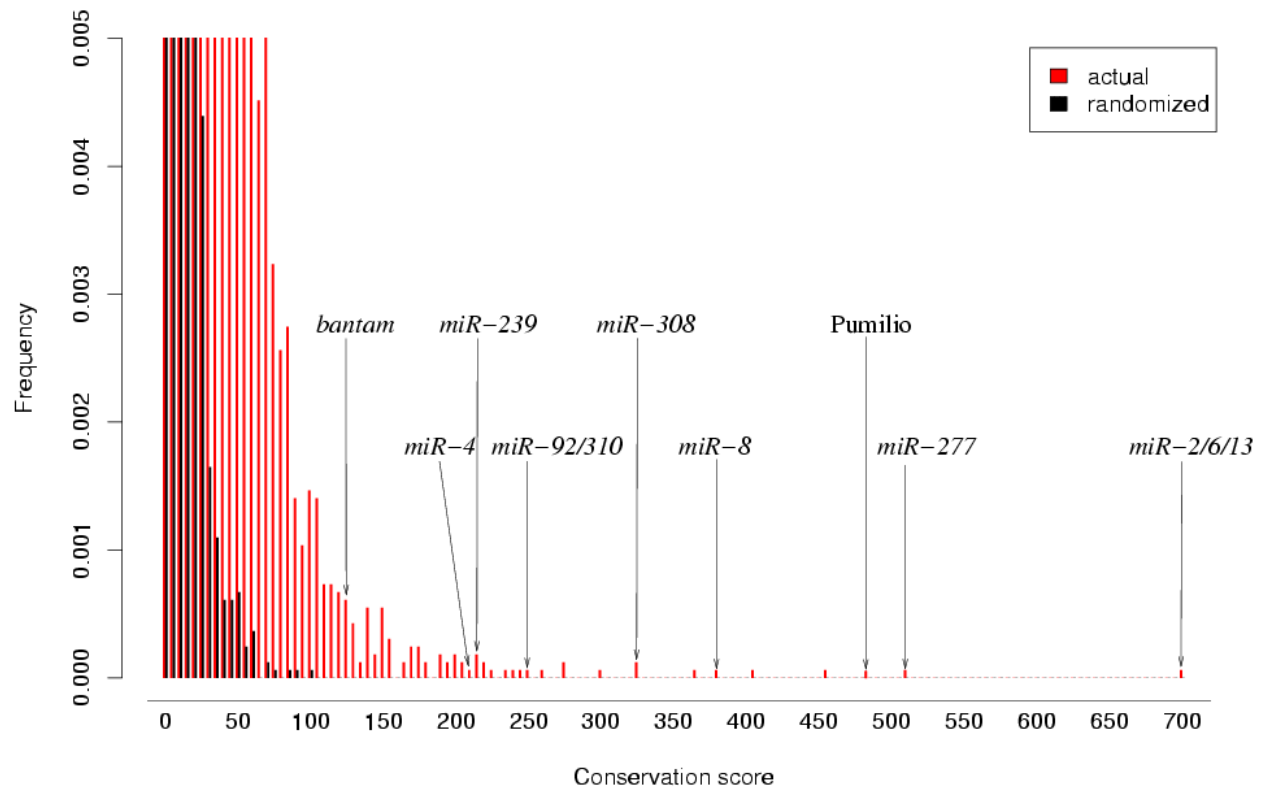

Supplement: pcbi.0010069.sg001.pdf [file pcbi.0010069.sg001.pdf]
