# Supplementary material
Source: PubMed Central journal article supplement (PMC1323458)

**Figure S2.** (A) number of complementary fly miRNAs as a function of initial number of retained 7-mers, (B) proportion of fly 7-mers complementary to the 5' extremity of at least one fly miRNA, as a function of the conservation rank (using a sliding window of size 50).

(A)

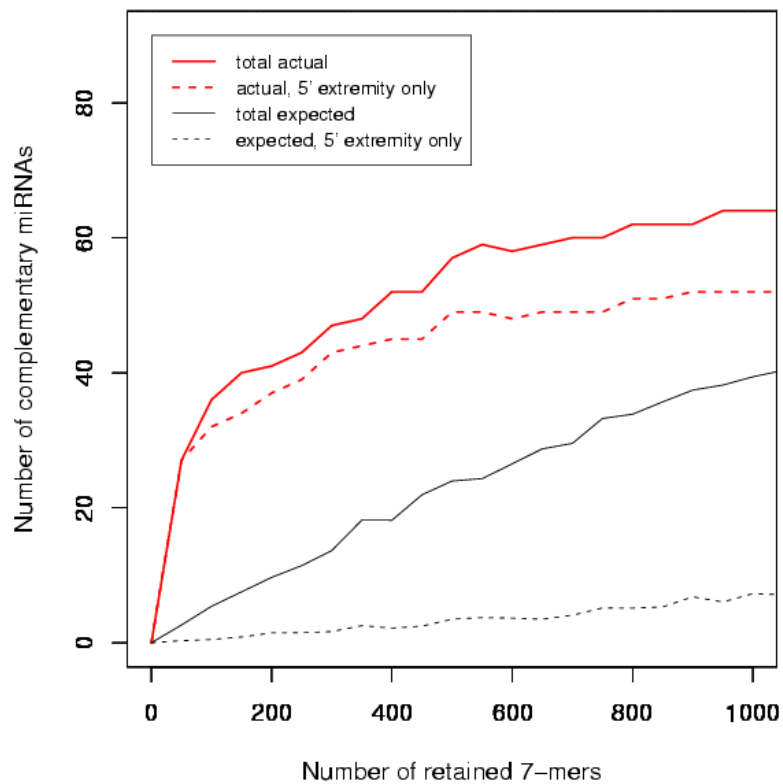

(B)

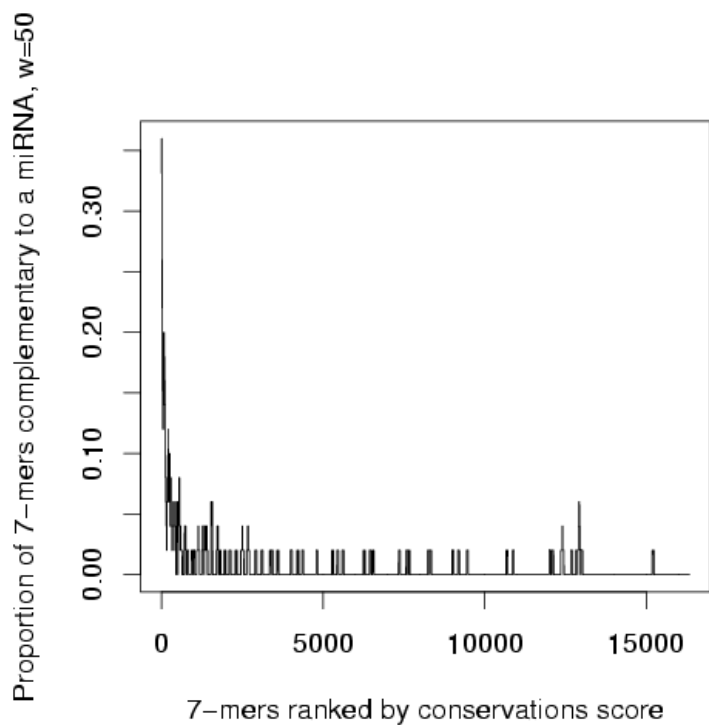

Supplement: pcbi.0010069.sg002.pdf [file pcbi.0010069.sg002.pdf]
