# Supplementary material
Source: PubMed Central journal article supplement (PMC1323458)

**Figure S3.** Distribution of distances (in nucleotides) from the first nucleotide of the  $k$ -mer to the 5' extremity of the miRNA, for all pairs of high scoring  $k$ -mers / complementary miRNAs. The distribution clearly shows that complementarity between high scoring fly  $k$ -mers and miRNAs occurs primarily at the 5' extremity of the miRNAs.

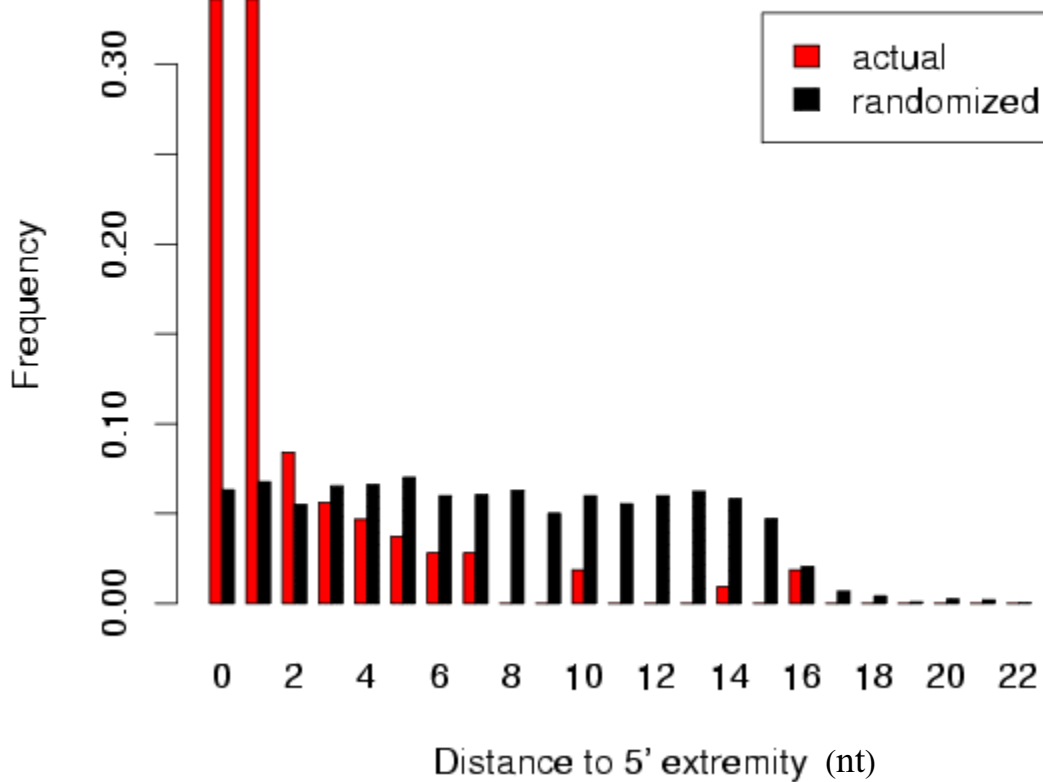

Supplement: pcbi.0010069.sg003.pdf [file pcbi.0010069.sg003.pdf]
