# Supplementary material
Source: PubMed Central journal article supplement (PMC1323458)
Supplement: pcbi.0010069.st001.pdf [file pcbi.0010069.st001.pdf]

**Table S1.** Illustrating the redundancy among some of the highest scoring worm  $k$ -mers. The top box shows  $k$ -mers (and their ranks) that have 1 nt difference with four of the highest scoring  $k$ -mers. The bottom box shows  $k$ -mers (and their ranks) that have a 6 nt overlap with the same four  $k$ -mers.

|                |     |                |     |                 |     |                |     |
|----------------|-----|----------------|-----|-----------------|-----|----------------|-----|
| <u>CUGUGAU</u> | 1   | <u>UGAUCUC</u> | 3   | <u>UGUAAAUA</u> | 9   | <u>ACAUUCC</u> | 12  |
| U.....         | 35  | C.....         | 58  | .....U..        | 130 | U.....         | 47  |
| A.....         | 67  | A.....         | 61  | .....A.         | 300 | C.....         | 159 |
| .....U.        | 164 | .....U         | 81  |                 |     | G.....         | 220 |
| G.....         | 166 | G.....         | 121 |                 |     |                |     |
| .....A         | 322 | .C.....        | 374 |                 |     |                |     |
| ....U..        | 423 | .....A         | 405 |                 |     |                |     |
| <u>CUGUGAU</u> | 1   | <u>UGAUCUC</u> | 3   | <u>UGUAAAUA</u> | 9   | <u>ACAUUCC</u> | 12  |
| -.....A        | 7   | -.....A        | 14  | C.....-         | 223 | -.....A        | 41  |
| -.....U        | 49  | -.....U        | 17  |                 |     | -.....C        | 99  |
| -.....C        | 109 | A.....-        | 91  |                 |     | -.....U        | 103 |
| -.....G        | 345 | -.....G        | 129 |                 |     | -.....G        | 256 |
|                |     | -.....C        | 412 |                 |     |                |     |
