# Supplementary material
Source: PubMed Central journal article supplement (PMC1323458)
Supplement: pcbi.0010069.st002.pdf [file pcbi.0010069.st002.pdf]

**Table S2.** Fly  $k$ -mers complementary to 5' extremity of known fly miRNAs.  $k$ -mers are grouped by sequence similarity and overlap. Each  $k$ -mer within a group is complementary to (*i.e.* matches) at least one miRNA, indicated by a number. If the  $k$ -mer is also found within the list of highest conserved worm  $k$ -mers, its rank is given, and \* indicates that the  $k$ -mer is also complementary to the 5' extremity of a worm miRNA.

| Rank | Worm rank | $k$ -mers | Matches | complementary miRNAs                                                                                                                                                                                                                                                                                              |
|------|-----------|-----------|---------|-------------------------------------------------------------------------------------------------------------------------------------------------------------------------------------------------------------------------------------------------------------------------------------------------------------------|
| 1    | 7*        | UGUGAUA   | 1-6     | (1) <i>miR-2a</i> <b>UAUCACAgccagcuuugaugagc</b>                                                                                                                                                                                                                                                                  |
| 9    | 49        | UGUGAUU   | 7       | (2) <i>miR-2b</i> <b>UAUCACAgccagcuuugaggagc</b>                                                                                                                                                                                                                                                                  |
| 10   | 1*        | CUGUGAU   | 1-7     | (3) <i>miR-2c</i> <b>UAUCACAgccagcuuugaugggc</b><br>(4) <i>miR-6</i> <b>UAUCACAguggcuguucuuuuu</b><br>(5) <i>miR-13a</i> <b>UAUCACAgccauuuugaugagu</b><br>(6) <i>miR-13b</i> <b>UAUCACAgccauuuugaugagu</b><br>(7) <i>miR-308</i> <b>AAUCACAggauuauacugugag</b>                                                    |
| 3    | -         | GCAUUUA   | 1       | (1) <i>miR-277</i> <b>UAAAUGCacuucugguacgaca</b>                                                                                                                                                                                                                                                                  |
| 6    | 107*      | UGCAUUU   |         |                                                                                                                                                                                                                                                                                                                   |
| 7    | -         | AGUAUUA   | 1       | (1) <i>miR-8</i> <b>UAAUACUgucagguaaagauguc</b>                                                                                                                                                                                                                                                                   |
| 37   | 132*      | CAGUAUU   |         |                                                                                                                                                                                                                                                                                                                   |
| 13   | 23*       | CUAGUCA   | 1, 2    | (1) <i>miR-279</i> <b>UGACUAGauccacacucuuuaa</b>                                                                                                                                                                                                                                                                  |
| 27   | 5*        | UCUAGUC   |         | (2) <i>miR-286</i> <b>UGACUAGaccgaacacucgugcu</b>                                                                                                                                                                                                                                                                 |
| 14   | 19*       | GUGCAAU   | 1-6     | (1) <i>miR-92a</i> <b>cAUUGCACuugucccgccuau</b><br>(2) <i>miR-92b</i> <b>aAUUGCACuagucccgccugc</b><br>(3) <i>miR-310</i> <b>uAUUGCACacuucccgccuuu</b><br>(4) <i>miR-311</i> <b>uAUUGCACauucaccggccuga</b><br>(5) <i>miR-312</i> <b>uAUUGCACuugagacggccuga</b><br>(6) <i>miR-313</i> <b>uAUUGCACuuuucacagcccga</b> |
| 15   | 12*       | ACAUCC    | 1       | (1) <i>miR-1</i> <b>uGGA AUGUaaagaaguauaggag</b>                                                                                                                                                                                                                                                                  |
| 42   | 41*       | CAUCCCA   |         |                                                                                                                                                                                                                                                                                                                   |
| 23   | 27*       | AGCUUUA   | 1, 2    | (1) <i>miR-4</i> <b>aUAAAGCUagacaaccauuga</b><br>(2) <i>miR-79</i> <b>UAAAGCUagauuaccaaagcau</b>                                                                                                                                                                                                                  |
| 28   | 13*       | GUGCCUU   | 1       | (1) <i>miR-124</i> <b>uAAGGCACgcgguagaugccaag</b>                                                                                                                                                                                                                                                                 |
| 116  | -         | UGCCUUA   |         |                                                                                                                                                                                                                                                                                                                   |
| 29   | -         | CCAAAGA   | 1-3     | (1) <i>miR-9a</i> <b>UGUUUGGuuaucuagcuguauaga</b><br>(2) <i>miR-9b</i> <b>UGUUUGGugauuuuagcuguauag</b><br>(3) <i>miR-9c</i> <b>UGUUUGGuaaucuagcuguaga</b>                                                                                                                                                         |
| 31   | 160       | GUGCCAA   | 1       | (1) <i>miR-263b</i> <b>cUUGGCACugggagaaauccac</b>                                                                                                                                                                                                                                                                 |
| 38   | -         | AGACUGA   | 1       | (1) <i>miR-14</i> <b>UCAGUCUuuuucucucuccua</b>                                                                                                                                                                                                                                                                    |
| 51   | -         | AAGACUG   |         |                                                                                                                                                                                                                                                                                                                   |
| 52   | -         | AAAAGAC   | 1       | (1) <i>miR-316</i> <b>uGUCUUUUuccgcuuacuggcg</b>                                                                                                                                                                                                                                                                  |
| 77   | -         | AAAGACA   |         |                                                                                                                                                                                                                                                                                                                   |
| 64   | -         | AGUACAA   | 1       | (1) <i>miR-305</i> <b>aUUGUACUcaucaggugcucug</b>                                                                                                                                                                                                                                                                  |
| 435  | -         | GUACAAU   |         |                                                                                                                                                                                                                                                                                                                   |
| 89   | 14*       | GAUCUCA   | 1       | (1) <i>bantam</i> <b>UGAGAUCAuuuugaagcugauu</b>                                                                                                                                                                                                                                                                   |
| 93   | -         | CCGUCCA   | 1       | (1) <i>miR-184</i> <b>UGGACGGagaacugauaagggc</b>                                                                                                                                                                                                                                                                  |
| 283  | -         | UCCGUCC   |         |                                                                                                                                                                                                                                                                                                                   |
| 98   | 34*       | UUGCUCA   | 1       | (1) <i>miR-87</i> <b>uUGAGCAAaauuucaggugug</b>                                                                                                                                                                                                                                                                    |
| 118  | 93*       | UGCUCAA   |         |                                                                                                                                                                                                                                                                                                                   |
| 105  | -         | UGAUUUUA  | 1       | (1) <i>miR-283</i> <b>UAAAUAUCAgugguaauucu</b>                                                                                                                                                                                                                                                                    |
| 110  | 441       | ACUGCCA   | 1       | (1) <i>miR-34</i> <b>UGGACAGugguuagcugguug</b>                                                                                                                                                                                                                                                                    |
| 218  | 202*      | CACUGCC   |         |                                                                                                                                                                                                                                                                                                                   |
| 126  | 345*      | UGUGAUG   | 1       | (1) <i>miR-11</i> <b>CAUCACAgucugaguucucgc</b>                                                                                                                                                                                                                                                                    |
| 143  | -         | GUUCCUA   | 1, 2    | (1) <i>miR-276a</i> <b>UAGGAACuucuuaccgugcucu</b>                                                                                                                                                                                                                                                                 |
| 369  | -         | AGUCCCU   |         | (2) <i>miR-276b</i> <b>UAGGAACuuuuuaccgugcucu</b>                                                                                                                                                                                                                                                                 |
| 188  | -         | GUCUCC    | 1       | (1) <i>miR-7</i> <b>uGGAAGACuagugauuuuuguugu</b>                                                                                                                                                                                                                                                                  |
| 196  | -         | GUGUUCA   | 1       | (1) <i>miR-317</i> <b>UGAACACagcuggugguauccagu</b>                                                                                                                                                                                                                                                                |
| 201  | -         | AUACUCA   | 1       | (1) <i>miR-12</i> <b>UGAGUAUuacaucagguacuggu</b>                                                                                                                                                                                                                                                                  |
| 321  | -         | AAUACUC   |         |                                                                                                                                                                                                                                                                                                                   |
| 238  | -         | UGAGAUU   | 1       | (1) <i>miR-304</i> <b>uAAUCUCAuuuuguaaaugugag</b>                                                                                                                                                                                                                                                                 |
| 241  | 66*       | UCUUGCC   | 1, 2    | (1) <i>miR-31a</i> <b>uGGCAAGAugucggcauagcuga</b><br>(2) <i>miR-31b</i> <b>uGGCAAGAugucggaaauagcug</b>                                                                                                                                                                                                            |
| 289  | 183*      | CAUGACA   | 1       | (1) <i>miR-281</i> <b>UGUCAUGgaaugcucucuuugu</b>                                                                                                                                                                                                                                                                  |
| 314  | 211*      | UACCUCA   | 1       | (1) <i>let-7</i> <b>UGAGGUAguagguuguauagu</b>                                                                                                                                                                                                                                                                     |
| 387  | -         | GUUCCUU   | 1       | (1) <i>miR-5</i> <b>aAAGGAACgaucguugugauaug</b>                                                                                                                                                                                                                                                                   |
| 488  | -         | ACGCACA   | 1       | (1) <i>miR-210</i> <b>uUGUGCGUgugacagcgguca</b>                                                                                                                                                                                                                                                                   |
| 490  | -         | CCAGUGA   | 1, 2    | (1) <i>miR-3</i> <b>UCACUGGgcaaagugugucuca</b><br>(2) <i>miR-318</i> <b>UCACUGGgcuuuguuuuucuca</b>                                                                                                                                                                                                                |
| 497  | -         | UGAUAAG   | 1       | (1) <i>miR-184*</i> <b>cCUUAUCAuucucucgccccg</b>                                                                                                                                                                                                                                                                  |
