# Supplementary material
Source: PubMed Central journal article supplement (PMC1323458)
Supplement: pcbi.0010069.st003.pdf [file pcbi.0010069.st003.pdf]

**Table S3.**  $k$ -mers complementary to known miRNAs, but not within the 5' extremity in worms (A) and flies (B).

(A)

| Rank | Fly rank | $k$ -mers | complementary miRNAs           |                                                   |
|------|----------|-----------|--------------------------------|---------------------------------------------------|
| 20   | -        | UGUACAA   | <i>miR-244</i>                 | ucuuugguuguacaaagugguaug                          |
| 38   | 40       | UUGUACA   |                                |                                                   |
| 89   | -        | UUUGUAC   |                                |                                                   |
| 439  | 368      | CUUUGUA   |                                |                                                   |
| 63   | -        | UUACGGG   | <i>miR-54</i><br><i>miR-56</i> | uacccguaaauucuaaaucggag<br>uacccguaauguuuccgcugag |
| 78   | -        | AUGUACA   | <i>miR-40</i>                  | ucaccggguguacaucagcuaa                            |
| 108  | -        | UGUACAC   |                                |                                                   |
| 80   | -        | GGUCUCA   | <i>lin-4</i>                   | ucccugagaccucaaguguga                             |
| 316  | -        | AGGUCUC   |                                |                                                   |
| 110  | -        | CCUACUA   | <i>let-7</i>                   | ugagguaguagguuguauaguu                            |
| 149  | 148      | UGCCAUU   | <i>miR-74</i>                  | uggcaagaauuggcagucuaa                             |
| 441  | 110*     | ACUGCCA   |                                |                                                   |
| 150  | -        | UGUGCAU   | <i>miR-60</i>                  | uauuauugcacaauuucuauguca                          |
| 190  | 121      | UUGCCAA   | <i>miR-266</i>                 | aggcaagacuauuggcacaaagc                           |
| 241  | 277      | UUUGCCA   | <i>miR-269</i>                 | ggcaagacucuggcacaaacu                             |
| 199  | -        | UGUAGAU   | <i>miR-42</i>                  | caccggguuaacaucauacag                             |
| 91   | -        | AUGAUCU   | <i>miR-80</i>                  | ugagaucauauaguugaaagccga                          |
| 204  | -        | GCUUUCA   | <i>miR-81</i>                  | ugagaucaucgugaaagcuagu                            |
| 360  | -        | AGCUUUC   | <i>miR-82</i>                  | ugagaucaucgugaaagccagu                            |
| 221  | -        | CCAUGUC   | <i>miR-71</i>                  | ugaaagacauuggguaguga                              |
| 247  | -        | UCUCAGG   | <i>miR-237</i>                 | ucccugagaaauucucgaacagcuu                         |
| 268  | -        | AACUGCC   | <i>miR-73</i>                  | uggcaagauguaggcaguuacagu                          |
| 277  | -        | UUACGGU   | <i>miR-360</i>                 | ugaccguaauuccguucacaa                             |
| 280  | -        | ACGGUUC   | <i>miR-61</i>                  | ugacuagaaccgguacucaucuc                           |
| 318  | 169*     | AGUGCCA   | <i>miR-228</i>                 | aauggcacugcagaaauucacgg                           |
| 362  | -        | UUUCUAG   | <i>miR-67</i>                  | ucacaaccuccuagaaagaguaga                          |
| 379  | -        | CCAGUGU   | <i>miR-229</i>                 | aaugacacugguuauuuuuccaucgu                        |
| 404  | -        | UAUGUGUA  | <i>miR-239a</i>                | uuuguacuacacauaggguacugg                          |
| 429  | -        | UUUCUCC   | <i>miR-38</i>                  | ucaccgggagaaaaacuggagu                            |
| 433  | -        | AGGUUGU   | <i>miR-67</i>                  | ucacaaccuccuagaaagaguaga                          |
| 436  | -        | CAUCAUC   | <i>miR-59</i>                  | ucgaaucguuuauacaggauaug                           |

(B)

| rank | Worm rank | $k$ -mers | complementary miRNAs             |                                                  |
|------|-----------|-----------|----------------------------------|--------------------------------------------------|
| 55   | -         | AAAGACU   | <i>miR-14</i>                    | ucagucuuuuucucucuccua                            |
| 65   | -         | GUAUUAA   | <i>miR-276b</i>                  | uaggaacuaauaacgcugcucu                           |
| 73   | -         | GUGCAUU   | <i>miR-277</i>                   | uaauugcacuaucugguacgaca                          |
| 77   | -         | AAAAGAC   | <i>miR-14</i>                    | ucagucuuuuucucucuccua                            |
| 82   | -         | GUGCAA    | <i>miR-287</i>                   | uguguugaaaaucguuugcac                            |
| 83   | -         | AACCAA    | <i>miR-9a</i>                    | uguuugguuauucagcuguaua                           |
| 85   | 136*      | CAUAUCA   | <i>miR-5</i>                     | aaaggaacgaucguugugauaug                          |
| 91   | -         | UACCAA    | <i>miR-9c</i>                    | uguuugguuauucagcuguaga                           |
| 95   | 48*       | GUGCCAU   | <i>miR-263a</i>                  | guuaauuggcacuggaagaauucac                        |
| 148  | 149*      | UGCCAUU   |                                  |                                                  |
| 169  | 318*      | AGUGCCA   |                                  |                                                  |
| 133  | -         | AGCAACA   | <i>miR-315</i>                   | uuuugauuugugcucagaaagc                           |
| 334  | -         | GCAACAA   |                                  |                                                  |
| 134  | -         | ACAACAA   | <i>miR-7</i>                     | uggaagacuagugauuuuguugu                          |
| 391  | 334       | ACUAGUC   |                                  |                                                  |
| 141  | -         | AAGUGCA   | <i>miR-92a</i>                   | cauugcacuugucccgccuau                            |
| 300  | -         | CAAGUGC   | <i>miR-312</i><br><i>miR-313</i> | uauugcacuugagacggccuga<br>uauugcacuuuucacagcccga |
| 169  | 318*      | AGUGCCA   | <i>miR-263b</i>                  | cuuggcacugggagaaauucac                           |
| 254  | -         | UGUCUAG   | <i>miR-4</i>                     | auaaagcuagacaaccauuga                            |
| 444  | -         | UUGUCUA   |                                  |                                                  |
| 338  | -         | CAAAUUG   | <i>miR-304</i>                   | uaaucucaauuuguaaaugugag                          |
| 361  | -         | AUUGCAU   | <i>miR-281</i>                   | ugucauggaauugcucucuugu                           |
| 372  | -         | AGAGGCU   | <i>miR-282</i>                   | aaucuaagccucuaacaggcuuugcugu                     |
| 375  | -         | CAAUGCA   | <i>miR-33</i>                    | aggugcauuguagucgcauug                            |
| 381  | -         | CUAAGUA   | <i>miR-306</i>                   | ucagguacuagugacucuaa                             |
| 464  | -         | AGUCACU   |                                  |                                                  |
| 389  | 223       | UAUGCAA   | <i>miR-280</i>                   | uguauuuacguugcauugaaaugaua                       |

| rank | Worm rank | k-mers  | complementary miRNAs |                                   |
|------|-----------|---------|----------------------|-----------------------------------|
| 55   | -         | AAAGACU | <i>miR-14</i>        | uc <b>aguc</b> uuuuucucucuccua    |
| 65   | -         | GUAUUAA | <i>miR-276b</i>      | uaggaac <b>uuauac</b> cgugcucu    |
| 73   | -         | GUGCAUU | <i>miR-277</i>       | ua <b>aaugcac</b> uauucugguacgaca |
| 77   | -         | AAAAGAC | <i>miR-14</i>        | uc <b>aguc</b> uuuuucucucuccua    |
| 82   | -         | GUGCAAA | <i>miR-287</i>       | uguguugaaaauc <b>guuugcac</b>     |
| 83   | -         | AACCAAA | <i>miR-9a</i>        | ugu <b>uugguu</b> auucagcuguaua   |
| 85   | 136*      | CAUAUCA | <i>miR-5</i>         | aaaggaacgaucguug <b>ugauaug</b>   |
| 91   | -         | UACCAAA | <i>miR-9c</i>        | ugu <b>uugguu</b> auucagcuguaga   |
| 95   | 48*       | GUGCCAU | <i>miR-263a</i>      | guu <b>aauggcac</b> uggaagaauucac |
| 148  | 149*      | UGCCAUU |                      |                                   |
| 169  | 318*      | AGUGCCA |                      |                                   |
| 133  | -         | AGCAACA | <i>miR-315</i>       | uuuugau <b>uugugcu</b> cagaaagc   |
| 334  | -         | GCAACAA |                      |                                   |
| 475  | -         | UUGGACA | <i>miR-219</i>       | ugau <b>uguccaa</b> acgcaauucug   |
