# Supplementary material
Source: PubMed Central journal article supplement (PMC1323458)
Supplement: pcbi.0010069.st004.pdf [file pcbi.0010069.st004.pdf]

**Table S4.** Top 20 most conserved  $k$ -mer co-occurrences in flies. Pairs of  $k$ -mers were considered (scored) only if the pair members differ in at least 3 nt and if they are co-conserved in at least 10 genes. The number of genes for which the pairs of  $k$ -mers are conserved within the 3'UTRs is indicated in the table. The p-value represents the statistical significance of the intersection between the conserved sets of  $k$ -mer 1 and  $k$ -mer 2.

| Rank | $k$ -mer 1 | $k$ -mer 2 | #genes | p-value      | Comments / Best functional enrichments                                                                |
|------|------------|------------|--------|--------------|-------------------------------------------------------------------------------------------------------|
| 1    | UGUGAUA    | UAUUUAUU   | 29     | $<10^{-10}$  | <i>miR-2a/2b/2c/6/13a/13b</i> site and ARE                                                            |
| 2    | UGUGAUA    | AGCUUUA    | 24     | $<10^{-17}$  | <i>miR-2a/2b/2c/6/13a/13b</i> and <i>miR-277</i> , transcriptional repressor activity ( $p<10^{-8}$ ) |
| 3    | UAUUUAUU   | AGUAUUA    | 38     | $<10^{-19}$  | ARE and <i>miR-8</i>                                                                                  |
| 4    | CACACAC    | UAUAUAUA   | 120    | $<10^{-127}$ | Novel sites, organ development ( $p<10^{-9}$ )                                                        |
| 5    | UAUUUAUU   | UGUAAAUA   | 44     | $<10^{-19}$  | ARE and PUF                                                                                           |
| 6    | UAUUUAUU   | UGCAUUU    | 43     | $<10^{-15}$  | ARE and <i>miR-277</i>                                                                                |
| 7    | CACACAC    | UAUAUAC    | 106    | $<10^{-97}$  | Novel sites, organ development ( $p<10^{-9}$ )                                                        |
| 8    | UAUUUAUU   | GUGAUAU    | 19     | $<10^{-8}$   | ARE and novel                                                                                         |
| 9    | UGUGAUA    | UAUUUAUA   | 21     | $<10^{-10}$  | <i>miR-2a/2b/2c/6/13a/13b</i> site and ARE                                                            |
| 10   | UGCAUUU    | UUGUUAA    | 35     | $<10^{-19}$  | <i>miR-277</i> and novel                                                                              |
| 11   | CAGCAGC    | ACAACAA    | 63     | $<10^{-55}$  | Novel sites, regulation of transcription( $p<10^{-9}$ )                                               |
| 12   | UGCAUUU    | UUGUUAU    | 32     | $<10^{-14}$  | <i>miR-277</i> and novel                                                                              |
| 13   | UGCAUUU    | UAAUUUAU   | 32     | $<10^{-15}$  | <i>miR-277</i> and ARE                                                                                |
| 14   | UGUAAAUA   | UAAUUGUA   | 18     | $<10^{-13}$  | PUF and novel                                                                                         |
| 15   | AGUAUUA    | GUGAUAU    | 19     | $<10^{-12}$  | <i>miR-8</i> and novel                                                                                |
| 16   | GCAUUUA    | UUAGCAU    | 23     | $<10^{-23}$  | <i>miR-277</i> and novel                                                                              |
| 17   | UGCAUUU    | CACACAC    | 65     | $<10^{-40}$  | <i>miR-277</i> and novel, organ development ( $p<10^{-9}$ )                                           |
| 18   | UAUAUAC    | AACCAAA    | 85     | $<10^{-71}$  | Novel and <i>miR-9a-like</i>                                                                          |
| 19   | AGUAUUA    | UUUAGUU    | 38     | $<10^{-21}$  | <i>miR-8</i> and novel, neurogenesis ( $p<10^{-7}$ )                                                  |
| 20   | CACACAC    | UUUAGUU    | 79     | $<10^{-58}$  | Novel sites, organ development ( $p<10^{-9}$ )                                                        |
