# Supplementary material
Source: PubMed Central journal article supplement (PMC1323458)
Supplement: pcbi.0010069.st005.pdf [file pcbi.0010069.st005.pdf]

**Table S5.** Top 30 predicted *D. melanogaster* miRNAs, sorted by  $\Delta G$ . Red miRNAs are known, black ones are novel. Pos is the position of the  $k$ -mer in the chromosome.  $\Delta G$  is the MFE of the precursor stem-loop. E-value measures the conservation of the stem-loop sequence in *D. pseudoobscura*. L is the annotation of the location in the genome in which the predicted miRNA lies (IN is intron; IG is intergenic).

| Rank | Name         | Mature miRNA             | k-mer    | Chrom | Pos      | $\Delta G$ | E-value | L  | Known           |
|------|--------------|--------------------------|----------|-------|----------|------------|---------|----|-----------------|
| 1    | dme-pmi-1a   | aUAUCACAgccagcuuugaugag  | UGUGAUA  | 2L    | 19565440 | -47.20     | 7E-37   | IN | <i>miR-2a-2</i> |
| 2    | dme-pmi-1b   | aUAUCACAgccagcuuugaggag  | UGUGAUA  | 2L    | 19566133 | -45.76     | 7E-37   | IN | <i>miR-2b-2</i> |
| 3    | dme-pmi-408a | gAUUGCCAuugccguugcuguug  | UGGCAAU  | 3R    | 12511982 | -45.41     | 2E-31   | IN | -               |
| 4    | dme-pmi-79a  | uGCAACAuuugcagcaauuga    | UUGUUGC  | 3R    | 22996489 | -44.82     | 4E-29   | IG | -               |
| 5    | dme-pmi-201a | uUGAGUAUuacaucaagguacugg | AUACUCA  | X     | 15343415 | -44.16     | 2E-31   | IN | <i>miR-12</i>   |
| 6    | dme-pmi-116a | cUAAGGCAuuuuugauugaccg   | UGCCUUA  | X     | 6283186  | -44.10     | 3E-36   | IG | -               |
| 7    | dme-pmi-3a   | gUAAAUGCacuaucugguacgac  | GCAUUUA  | 3R    | 5925801  | -44.04     | 4E-29   | IG | <i>miR-277</i>  |
| 8    | dme-pmi-488a | uUGUGCGUgugacagcgguauu   | ACGCACA  | X     | 17962208 | -43.87     | 2E-34   | IG | <i>miR-210</i>  |
| 9    | dme-pmi-24a  | cUAAGUACuagugccgcaggagu  | GUACUUA  | 3R    | 9290010  | -43.06     | 4E-38   | IN | -               |
| 10   | dme-pmi-126a | cCAUCACAaccuccuugagugag  | UGUGAUG  | 2R    | 5133091  | -42.42     | 1E-38   | IN | <i>miR-307</i>  |
| 11   | dme-pmi-346a | gCAGCUGCagcagcgacagcggu  | GCAGCUG  | 2R    | 12869266 | -41.84     | 7E-34   | IG | -               |
| 12   | dme-pmi-140a | aAAAUGGCgcacauuuuagcgg   | GCCAUUU  | 3R    | 26758835 | -41.36     | 1E-29   | IG | -               |
| 13   | dme-pmi-143a | gUAGGAAcucauaccgugcucu   | GUUCCUA  | 3L    | 10339227 | -40.97     | 3E-33   | IG | <i>miR-276a</i> |
| 14   | dme-pmi-28a  | uAAGGCACgcgguuauugccaag  | GUGCCUU  | 2L    | 17562355 | -40.82     | 1E-32   | IG | <i>miR-124</i>  |
| 15   | dme-pmi-151a | uUAUUGUCauuuuauuguuguu   | GACAAUA  | 3L    | 15241046 | -40.68     | 1E-29   | IG | -               |
| 16   | dme-pmi-23a  | aUAAAGCUagauuaccaaagcau  | AGCUUUA  | 2L    | 16694541 | -40.13     | 1E-29   | IN | <i>miR-79</i>   |
| 17   | dme-pmi-3b   | uUAAAUGCaccguuaacuacuuc  | GCAUUUA  | X     | 11590220 | -40.12     | 2E-31   | IN | -               |
| 18   | dme-pmi-3c   | uUAAAUGCaccguuaacuacuuc  | GCAUUUA  | X     | 11576952 | -40.12     | 2E-31   | IG | -               |
| 19   | dme-pmi-71a  | uGCUGCUGuuguugcggccgu    | CAGCAGC  | 3L    | 10996048 | -39.97     | 3E-33   | IG | -               |
| 20   | dme-pmi-29a  | gUCUUUGGuuaucaugcuguauug | CCAAAGA  | 3L    | 19530398 | -39.71     | 1E-38   | IG | <i>miR-9a</i>   |
| 21   | dme-pmi-1c   | uUAUCACAuucacauugcauuug  | UGUGAUA  | 2L    | 17153435 | -38.86     | 4E-29   | IG | -               |
| 22   | dme-pmi-277a | cUGGCAAAcuccguuugacugcu  | UUUGCCA  | 2L    | 17884567 | -38.58     | 4E-29   | IG | -               |
| 23   | dme-pmi-365a | gCCAACAAuuuacugcgacaug   | UUGUUGG  | 3R    | 27091354 | -38.56     | 2E-31   | IG | -               |
| 24   | dme-pmi-74a  | cAAUGCAUucgaucgucucucug  | AAUGCAUU | 3L    | 21723559 | -38.44     | 4E-29   | IG | -               |
| 25   | dme-pmi-32a  | gGUGUGUGugcucuaucagcgcc  | CACACAC  | 3R    | 24403146 | -38.06     | 1E-29   | IG | -               |
| 26   | dme-pmi-95a  | uAUGGCACguuuuaguguuuuug  | GUGCCAU  | 2R    | 15418600 | -37.95     | 7E-34   | IG | -               |
| 27   | dme-pmi-14a  | aAUUGCACAuuucacguuguugc  | GUGCAAU  | X     | 20126099 | -37.86     | 2E-31   | IG | -               |
| 28   | dme-pmi-71b  | aGCUGCUGcuuuuuuuuugcc    | CAGCAGC  | 3L    | 5100430  | -37.85     | 2E-31   | IG | -               |
| 29   | dme-pmi-59a  | cUUGCACUuuuugccaauggcu   | AGUGCAA  | 3R    | 25354567 | -37.82     | 3E-33   | IG | -               |
| 30   | dme-pmi-145a | gAAAUUGCuggcauuucgagag   | GCAAUUU  | 2L    | 3576510  | -37.62     | 6E-31   | IG | -               |
